# Supplementary material
Source: PubMed Central journal article supplement (PMC3627294)

1 **Supplementary Figure legends**

2

3 **Supplementary Figure 1. A.** Telomerase activity was measured in MEFs extracts grown in the  
4 presence or absence of TA-65 for 24h and 5 days. Two different concentrations of TA-65 were  
5 tested. A cellular extract from HCT116 cells was included as a positive control, and RNase was  
6 added in all experimental settings as negative control. IC, PCR efficiency control.

7

8 **Supplementary Figure 2. A** Body weight of the indicated mice before or after treatment is given  
9 as mean $\pm$ SEM.

10

11 **Supplementary Figure 3. A.** Fold change in mTERT mRNA levels 3 months post treatment in  
12 different tissues of 1 year old TA-65 treated mice compared to age-matched controls. mTERT  
13 mRNA values were normalized to actin. **B.** Fold change in JunB mRNA levels 3 months post  
14 treatment in different tissues of 1 year old TA-65 treated mice compared to age-matched controls.  
15 JunB mRNA values were normalized to actin. **C.** Fold change in c-Myc mRNA levels 3 months post  
16 treatment in different tissues of 1 year old TA-65 treated mice compared to age-matched controls.  
17 c-Myc mRNA values were normalized to actin.

18

19 **Supplementary Figure 4. A.** Fold changes in CD44, CyclinD1, Klf4, Fibronectin and p16 mRNA  
20 levels in liver extracts of TA-65 treated mice compared to age-matched controls. mRNA values  
21 were normalized to actin.

22

23 **Supplementary Figure 5. A.** Percentage of Ki67-positive cells in the lung from mice non-treated  
24 (control) or treated with TA-65. Student's t-test was used for statistical assessments. At least 4  
25 HPF (x100) were used per independent mouse (around 24000 lung cells scored per mouse). **B.**  
26 Representative Ki67 immunohistochemistry images of lung from the indicated mice cohorts. **C.**  
27 Percentage of TUNEL-positive (Apoptag detection kit) cells in the lung from mice non-treated

1 (control) or treated with TA-65. Student's t-test was used for statistical assessments. At least 4  
2 HPF (x100) were used per independent mouse (around 24000 cells scored per mouse). **D.**  
3 Representative TUNEL stained images of lung from the indicated mice cohorts. **E.** Percentage of  
4 Ki67-positive cells in the liver from mice non-treated (control) or treated with TA-65. Student's t-test  
5 was used for statistical assessments. At least 5 HPF (x100) were used per independent mouse  
6 (around 3000 hepatocytes scored per mouse). **F.** Representative Ki67 immunohistochemistry  
7 images of liver from the indicated mice cohorts. **G.** Percentage of TUNEL-positive (Apoptag  
8 detection kit) cells in the liver from mice non-treated (control) or treated with TA-65. Student's t-test  
9 was used for statistical assessments. At least 5 HPF (x100) were used per independent mouse  
10 (around 3000 hepatocytes scored per mouse). **H.** Representative TUNEL stained images of liver  
11 from the indicated mice cohorts.  
12

A

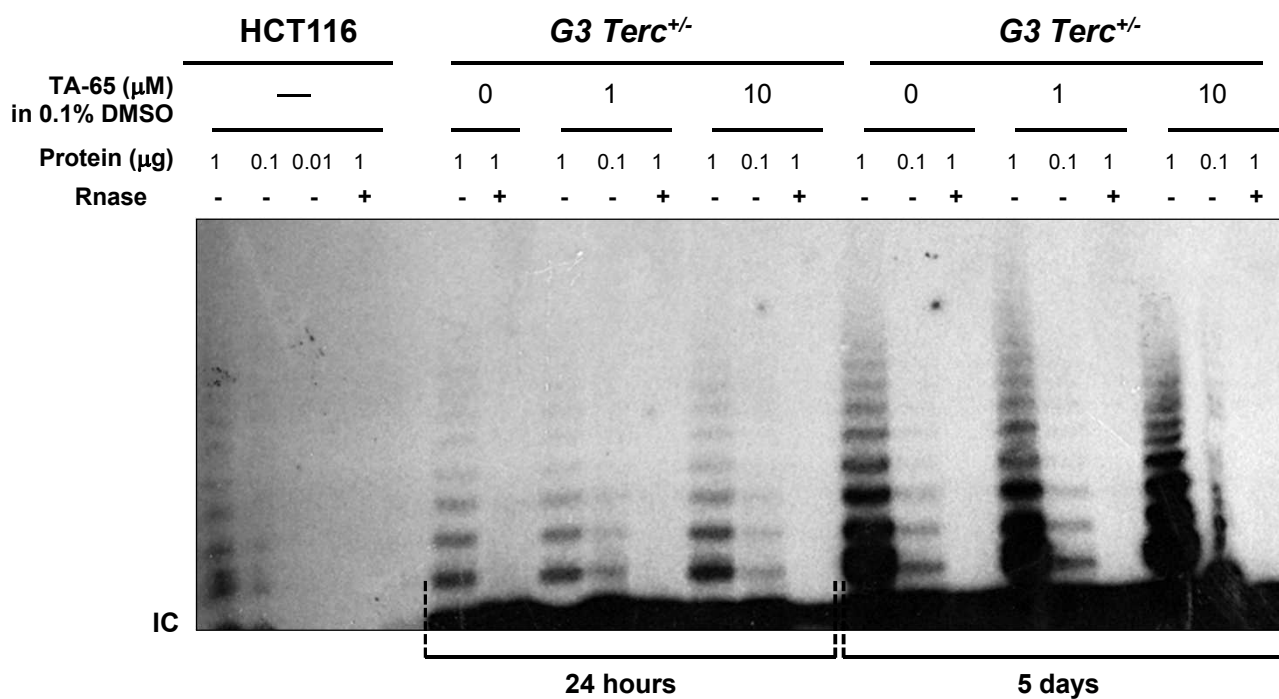

A

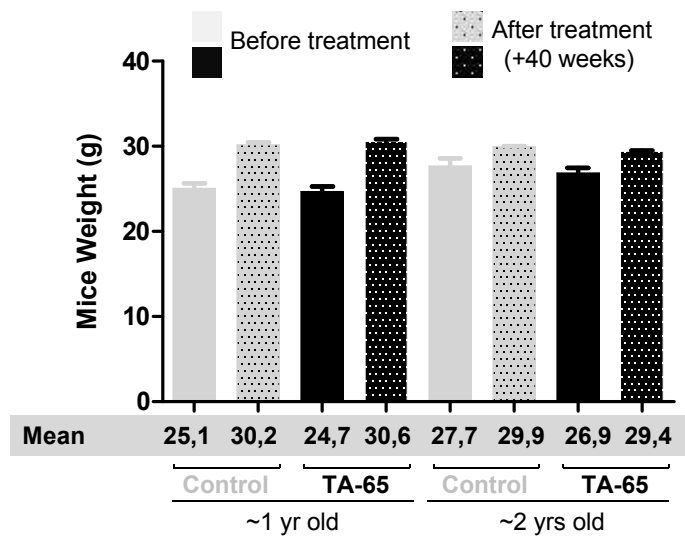

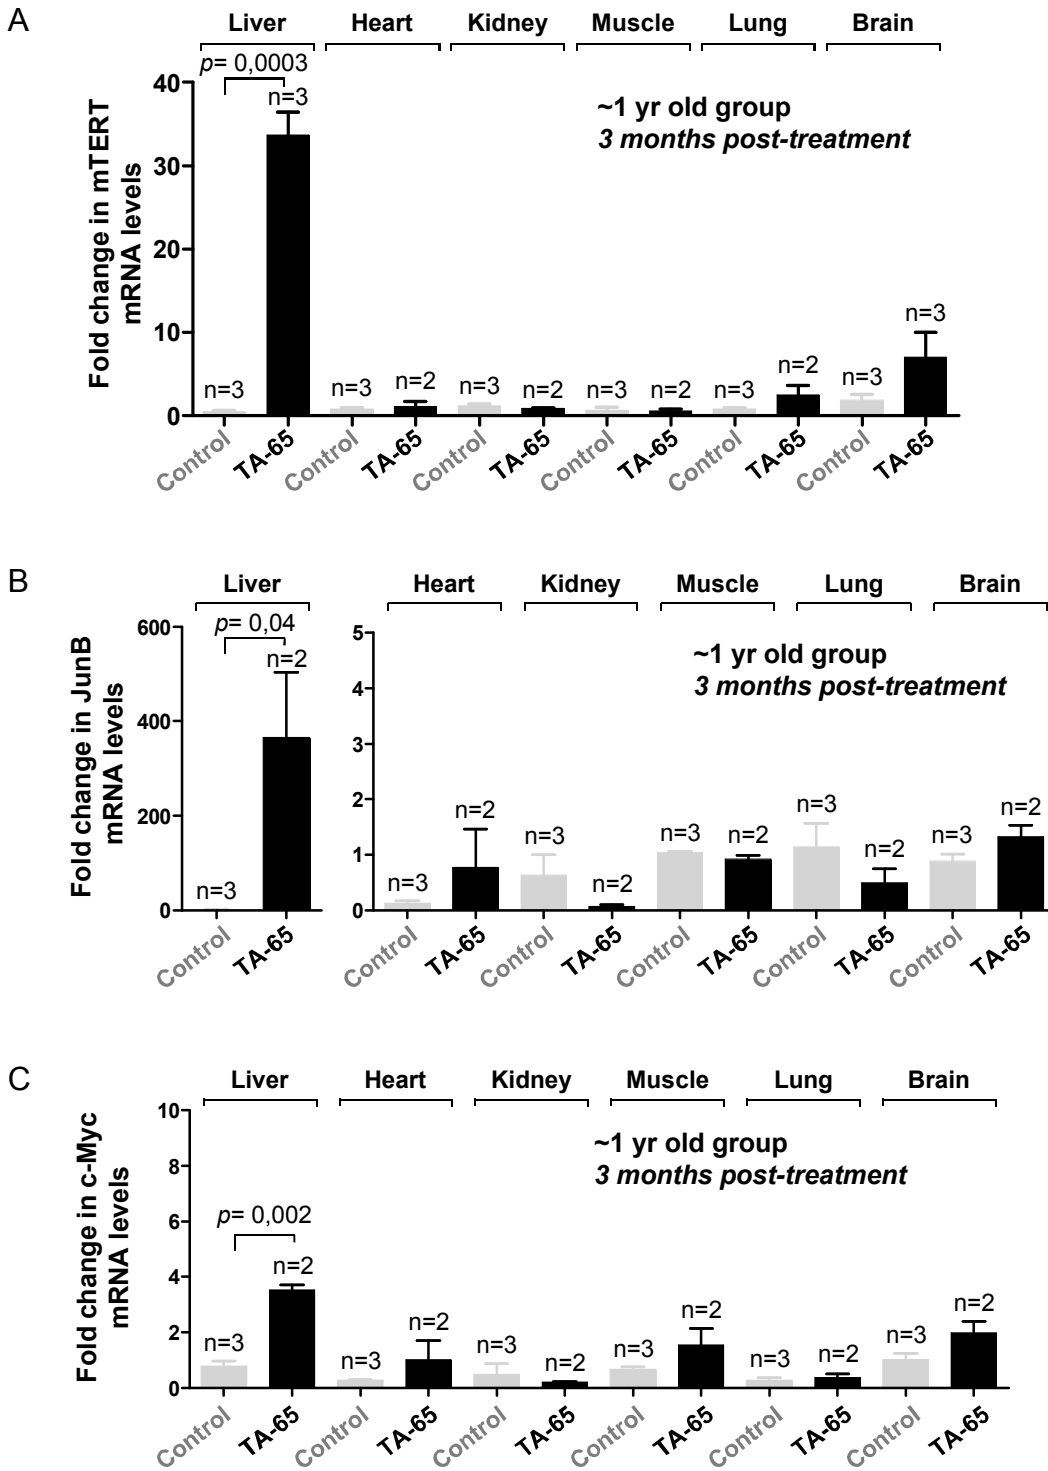

A

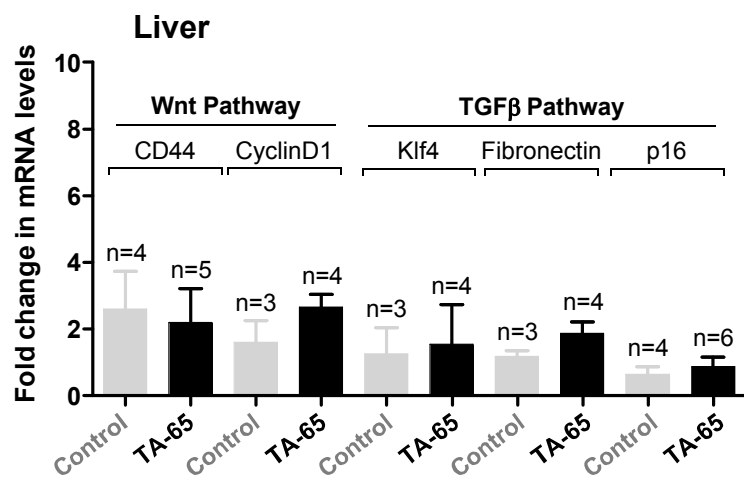

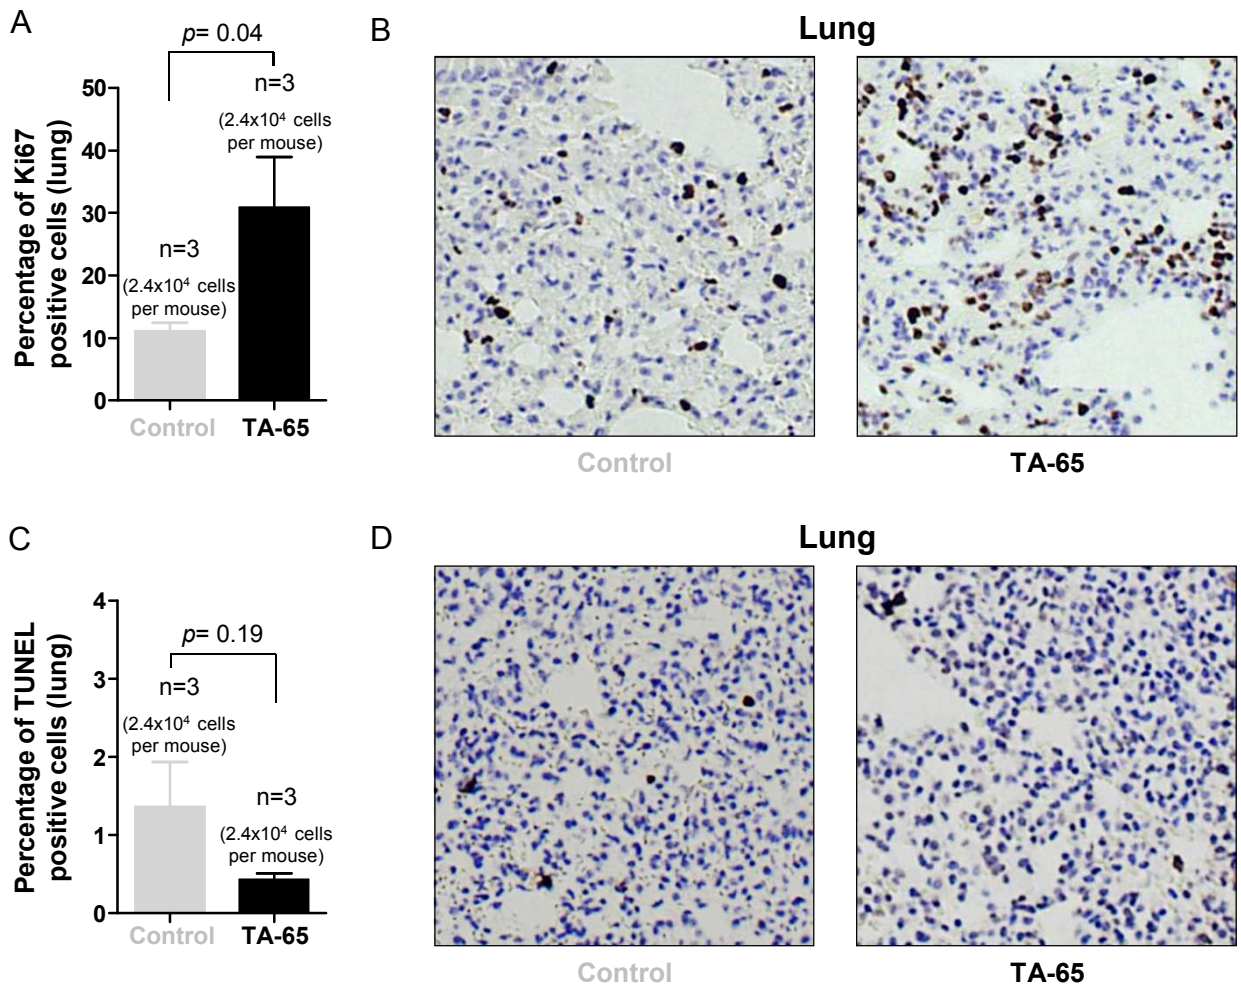

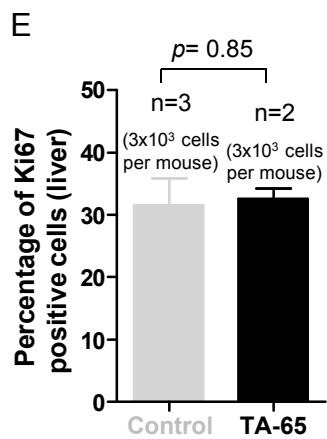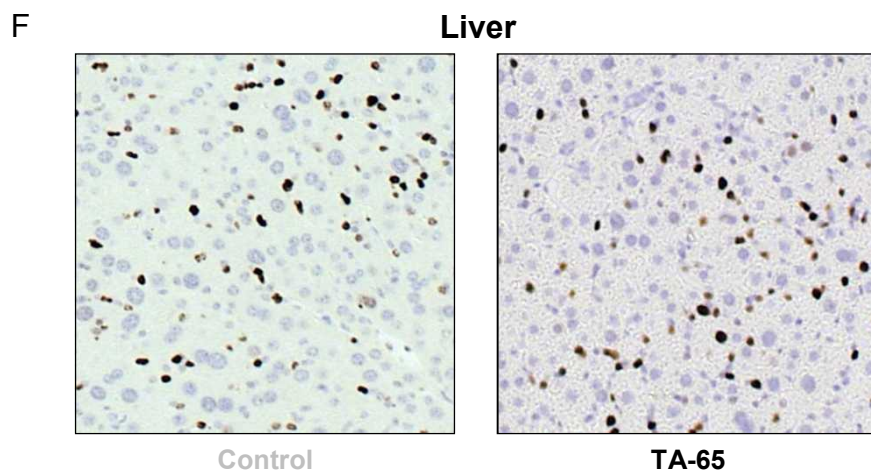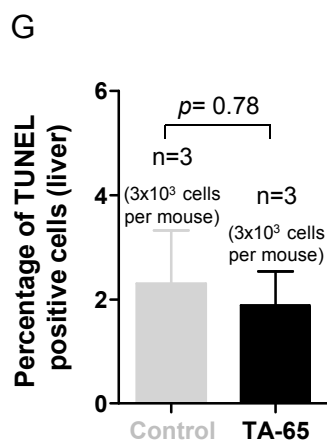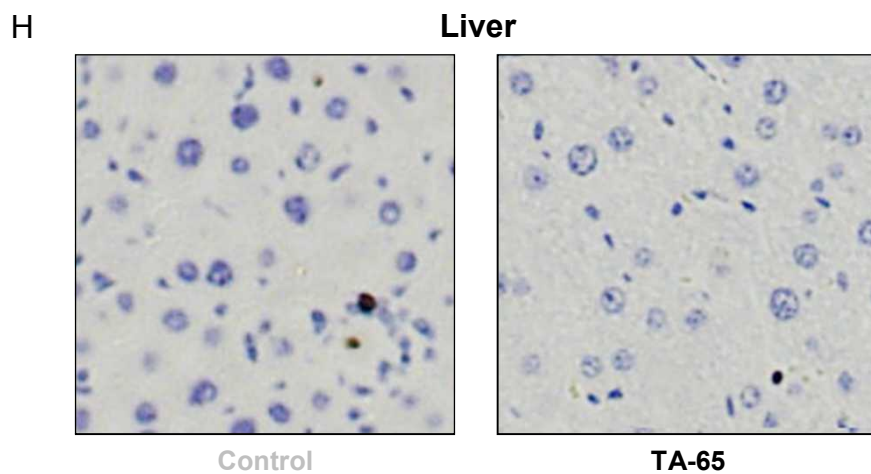

Supplement: NIHMS52485-supplement-01.pdf [file NIHMS52485-supplement-01.pdf]
